# Supplementary material for: Diversity and Biological Activities of Endophytic Fungi from the Flowers of the Medicinal Plant Vernonia anthelmintica
Source: MDPI journal article supplement (doi:10.3390/ijms231911935), 2022-10-08
Supplement: s1 [file s1]

## SUPPORTING INFORMATION

# Diversity and biological activities of endophytic fungi from the flowers of the medicinal plant *Vernonia anthelmintica*

Niu Litao <sup>1</sup>, Nigora Rustamova <sup>1,2</sup>, Hui Xia Ning <sup>1</sup>, Paiziliya Paerhati <sup>1</sup> and Abulimiti Yili <sup>1\*</sup>

<sup>1</sup> Key Laboratory of Plant Resources and Chemistry in Arid Regions, Xinjiang Technical Institute of Physics and Chemistry, Chinese Academy of Sciences, South Beijing Road 40-Urumqi, Xinjiang 830011, PR China;

<sup>2</sup> Department of Biology, Samarkand State University, University Boulevard 15, Samarkand 703004, Uzbekistan.

\* Correspondence: Correspondence: abu@ms.xjb.ac.cn; Tel.: +86-991-3835679 (A.Y.)

**Abstract:** Secondary metabolites produced by endophytic fungi are an important source of biologically active compounds. The current research was focused on the biological activities of ethyl acetate extracts of fungi, isolated and identified from *Vernonia anthelmintica* flowers for the first time. In addition, an investigation of the non-polar chemical composition of dichloromethane-ethyl acetate extracts of the most active fungal strain was carried out. The isolates included *Ovatospora senegalensis* NR-03, *Chaetomium globosum* NR-04, *Thielavia subthermophila* NR-06, *Aspergillus calidoustus* NR-10, *Aspergillus keveii* XJF-23 and *Aspergillus terreus* XJF-3 species. Strains were identified by 18S rRNA gene sequencing methods and were registered in GenBank. Crude extracts of the fungi displayed *in vitro* biological activities including antimicrobial and cytotoxic activities. A melanin content assay was performed on murine B16 cells. An ethyl acetate extract of *O. senegalensis* NR-03 showed high anticancer and antimicrobial activity; therefore, we also studied the non-polar chemical composition of the dichloromethane-ethyl acetate fraction and identified 52 non-polar compounds with the different medium. This investigation discovered that the secondary metabolites of the total extract of endophytic fungi could be a potential source of alternative natural antimicrobial, cytotoxic and melanin synthesis activity in their host plant, and the isolation of bioactive metabolites may provide a lead to new compounds of pharmaceutical significance.

**Keywords:** *Vernonia anthelmintica* flowers; biological activities; non-polar chemical composition; endophytic fungi

## Gene sequences of endophytic fungi

### *Aspergillus terreus* XJF-3

ATTGATATGCTTAAGTTCAGCGGGTATCCCTACCTGATCCGAGGTCAACCTGGAAAAAACAAGTTGCAATAAATGCGTCGGCGGGCGCGCGCGCGCTACGGAGCGG  
AAGACGAAGCCCATACGCTCGAGGACCGGACGCGGTGCCGCCGCTGCTTCGGGCCCGTCCCCGGGAGCGGGGGACGAGGGCCCAACACACAAGCCGGGCTTGAG  
GGCAGCAATGACGCTCGGACAGGCATGCCCCCGGAATACCAGGGGGCGCAATGTGCGTTCAAAGACTCGATGATTCAGTGAATTCGCAATTCACATTAGTTATCGCATT  
TCGCTGCGTTCTCATCGATGCCGGAACCAAGAGATCCATTGTTGAAAAGTTTAACTGATTGCAAGAATCACACTCAGACTGCAAGCTTTCAGAACAGGGTTCATGTTGGG  
GTCTCCGGCGGGACCGGGCCGGGGCGGAGTCGCCCGCGGCCAGCAACGCTGGCGGGCCCGCAAGCAACAAGGTACAATAGTACCGGGTGGGAGGTTGGGCCA  
TAAAGACCCGCACTCGGTAATGATCCTTCGCAG

### *Ovatospora senegalensis* NR-03

AAAGCGGAGGAAAAGAAACCAACAGGGATTGCCCAAGTAACGGCGAGTGAAGCGGCAACAGCTCAAATTTGAAATCTGGCTTCGGCCCGAGTTGTAATTTGTAGAGGATG  
CTTTGGGCGCGGCGCTTCTGAGTTCCCTGGAAACGGGACGCCACAGAGGTGAGAGCCCGTATAGTTGGACGCTAGCCTGTGTAAGCTCCTTCGACGAGTCGAGTAGT  
TTGGGAATGCTGCTCAAAATGGGAGGTAAATTTCTTCTAAAGCTAAATACCGGCCAGAGACCGATAGCGCACAAAGTAGAGTGATCGAAAGATGAAAAGCACTTTGAAAAG  
AGGGTTAAATAGCAGTGAAATTTGTTGAAAGGAAGCGCTTGTGACCAGACTTGGCCGGGCCGATCATCCGGGTTCTCCCCGTTGCACTCGGCCCGGCTCGGGCCAGCA

TCGGTTCTCGCGGGGGGACAAAGGCCTCGGGAATGTAGCTCCTCCGGGAGTGTTATAGCCCGGGGCGTAATGCCCTCGCGGGGACCGAGGTACGCGCATCTGCAAGGATG  
CTGGCGTAATGGTCACCAGCGACCCGCTTG

### *Chaetomium globosum* NR-04

CTGCGGAGGGATCATTACAGAGTTGCCAAAACCTCCAAAACCATTTGTGGACGAACCTGACAGTTGCTTCGGCAGGTCGGCTTCCGCCGCGCGGTGGCTCCTTGTAGCCCGC  
CTGCGGAGTTATATAAACTCTTGATTATTGTGACATCTCTGAGTAATTTACTTAATAAGTTAAAACTTTCAACAACGGATCTCTTGGTTCTGGCATCGATGAAGAACGCAG  
CGAAATGCGATAAGTAATGTGAATTGCAGAATTCACTGTAATCATCGAATCTTTGAACGCACATTGCGCCCGCCAGTATTCTGGCGGGCATGCCTGTTCGAGCGTCATTTCAA  
CCATCAAGCTTTAAGCTTGTGTGGAGCTCTGCGGCTGTCGCGAGGCCCCATAATACAGTGGCGGGCTCGCTATCACACCGAGTGCAGTAGTTTTTCTTCTCGCTCAGGGCGT  
GTAGTGGGTGCTAGCCGTGAAACCCCTTTTACAAAGGTTGACCTCGGATCAGGTAGGAATACCCGCTGAACCTTAAGCATATCAA

### *Thielavia subthermophila* NR-06

CTGCGGAGGGATCATTACAGAGTTGCCAAAACCTCCCTAAACCATCGTGAACGTTACCCACAAATCGTTGCTTCGGCGGGCGGCGCCTCACCCGCGCCCCCTGCCAGGGGCC  
CTAACGGGCGTCCGCGGAGGCCTATAACCCCTGTATTATTTACGGCTTCTCTGAGTTTATACTTAAATAAGTCAAAAACCTTTCAACAACGGATCTCTTGGTTCTGGCATCGA  
TGAAGAACGCAGCGAAATGCGATAAGTAATGTGAATTGCAGAATTCAGTGAATCATCGAATCTTTGAACGCACATTGCGCCCCCAGTATTCTGGAGGGCATGCCTGTTCG  
AGCGTCATTTC AACCATCAAGCCCCGGGCTTGTGTTGGGGACCTGCGGCTGCCGAGGCCCGGAAAAGCAGTGGCGGGCTCGCTGTACACCGAGCGTAGTAGCAATACAC  
TCGCTCAGGGCGTGCTGCGGGTCCGGCCGTTAAACCCCTTAACCTTCAAGGTTGACCTCGGATCAGGTAGGAGTACCCGCTGAACCTTAAGCATATCA

### *Aspergillus calidoustus* NR-10

TGCGGAAGGATCATTACCGAGTGCAGGTCTGCCCGGGCAGGCCTAACCTCCCACCCGTGAATACCTGACCAACGTTGCTTCGGCGGTGCGCCCCCCCCCGGGGTAGCC  
GCCGGAGACCAACCGAACCTCCTGTCTTAGTGTGTCTGAGCTTGATAGCAAACCTATTA AAAACTTTCAACAATGGATCTCTTGGTTCCGGCATCGATGAAGAACGCAGC  
GAACTGCGATAAGTAATGTGAATTGCAGAATTCACTGTAATCATCGAGTCTTTGAACGCACATTGCGCCCCCTGGCATTCCGGGGGGCATGCCTGTCCGAGCGTCATTGCTGC  
CCTTCAAGCCCGCTTGTGTGTGGGTCTGTCCTCCCCCGGGGACGGGCCCGAAAGGCAGCGGGCGGCACCGCTCCGGTCTCGAGCGTATGGGGCTTTGTACCCCGCTC  
GATTAGGGCGGCGCGGCAGCGCGCTTCCAACTTCTATTTTACCAGGTTGACCTCGGATCAGGTAGGATACCCGCTGAACCTTAAGCATATCA

### *Aspergillus keveii* XJF-23

TGCATGTCTAGTATAAGCaATCTATACTGTGAAACTGCGAATGGCTCATTAAATCAGTTATCGTTTATTTGATAGTACCTTACTACATGGATACCTGTGGTAATTCTAGAGCTA  
ATACATGCTAAAAACCCCGACTTCGGGAGGGGTGTATTTATTAGATAAAAAACCAATGCCCTCGGGGCTCCTTGGTGATTCTAATAA ACTTAACGAATCGCATGGCCTTGC  
GCCGGCGATGGTTCAATTCAAATTTCTGCCCTATCAACTTTCGATGGTAGGATAGTGGCTACCATGGTGGCAACGGGTAACGGGGAATTAGGGTTCGATTCCGGAGAGGGA  
GCCTGAGAAACGGCTACCACATCCAAGGAAGGCAGCAGGCGCGCAAATTACCCAATCCCGACACGGGGAGGTAGTGACAATAAATACTGATACGGGGCTCTTTTGGGTCT  
CGTAATTGGAATGAGTACAATCTAAACCCCTTAACGAGGAACAATTGGAGGGCAAGTCTGGTGCCAGCAGCCGCGGTAATTCCAGCTCCAATAGCGTATATTAAAGTTGTT  
GCAGTTAAAAAGCTCGTAGTTGAACCTTGGGTCTGGCTGGCCGGTCCGCCTCACCGCGAGTACTGGTCCGGCTGGACCTTTCCTTCTGGGGAAGCCCATGGCCTTCACTGGC  
TGTGGGGGGAACAGGACTTTTACTGTGAAAAAATTAGAGTGTTCAAAGCAGGCCTTGTCTCGGATACATTAGCATGGAATAATAGAATAGGACGTGCGGTTCTATTTTGT  
GGTTTCTAGGACCGCGTAATGATTAAATAGGGATAGTCGGGGGCGTCAGTATTAGCTGTCTAGAGGTGAAATTCTTGGATTGTCTGAAGACTAACTACTGCGAAAGCATTCG  
CCAAGGATGTTTTCTAATAATCAGGGAACGAAAGTTAGGGGATCGAAGACGATCAGATACCGTCTGATGCTTAACCATAAACTATGCCGACTAGGGATCGGGCGGCGTTTCT  
ATGATGACCCGCTCGGCACCTTACGAGAAATCAAAGTTTTTGGGTTCTGGGGGAGTATGGTCGCAAGGCTGAAACTTAAAGAAATTGACGGAAGGGCACCAAGCGGT  
GGAGCTCGGGCTTAATTTGACTCAACACGGGGAACCTCACAGGTCCAGACAAAATAAGGATTGACAGATTGAGAGCTCTTCTTGATCTTTTGGATGGTGGTGCATGGCC  
GTTCCTAGTTGGTGAGTGATTGTCTGCTTAATTGCGATAACGAACGAGACCTCGGCCCTTAAATAGCCCGGTCCGCGTCTGCGGGCCGCTGGCTTCTTAGGGGACTATCG  
GCTCAAGCCGATGGAAGTGC GCGGCAATAACAGGTCTGTGATGCCCTTAGATGTTCTGGGCCGACGCGCGCTACACTGACAGGGCCAGCGAGTACATCACCTTGGCCGAG  
AGGCCTGGGTAATCTTGTAAACCCCTGTCGTGCTGGGGATAGAGCATTGCAATTATTGCTCTTCAACGAGGAATGCCTAGTAGGCACAGTATCAGCTCGTGCCGATTACG  
TCCCTGCCCTTTGTACACACCGCCGTCGCTACTACCGATTGAATGGCTCGGTGAGGCCTCCGGACTGGCGCAGGAGGGTTGGCAACGACCCCCCGCGCGGAAAGCTGG  
TCAAACCCGGTCATTAGAGAA

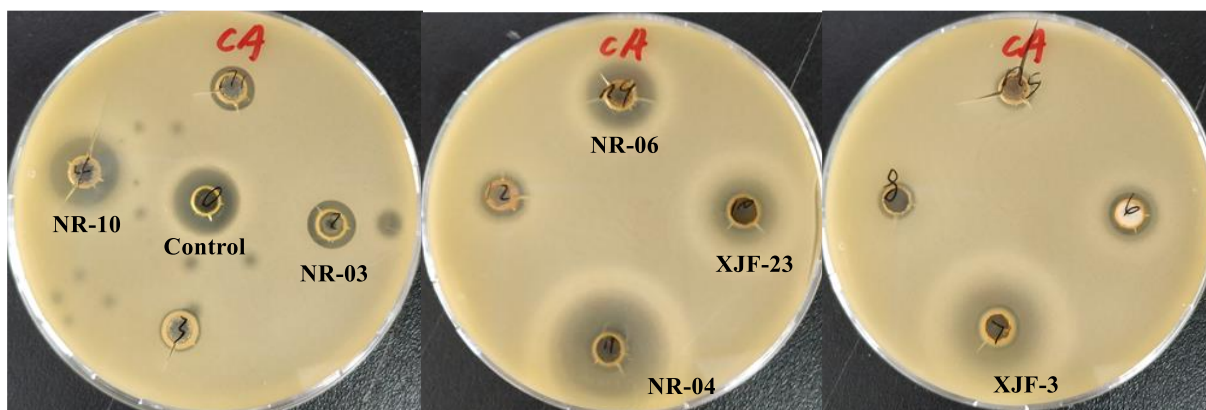

*Candida albicans*

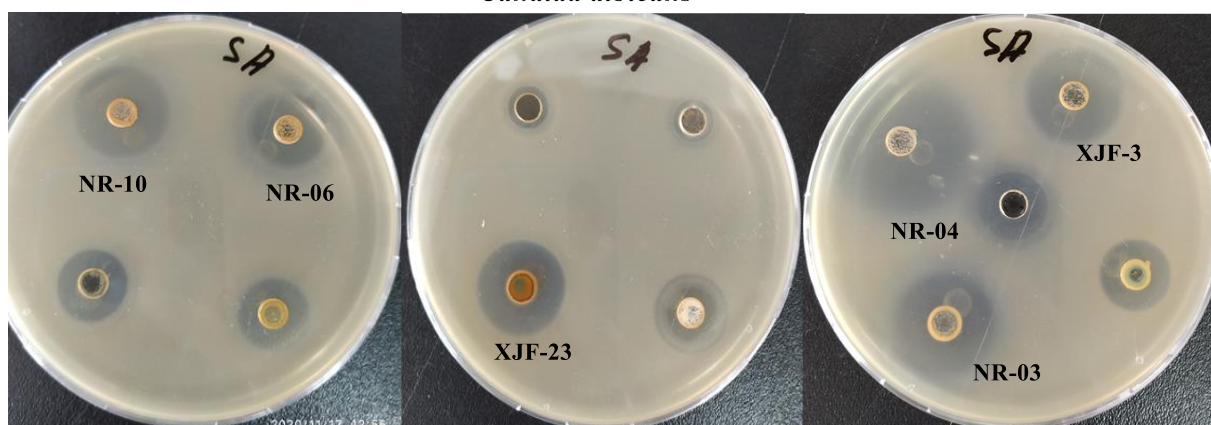

*Staphylococcus aureus*

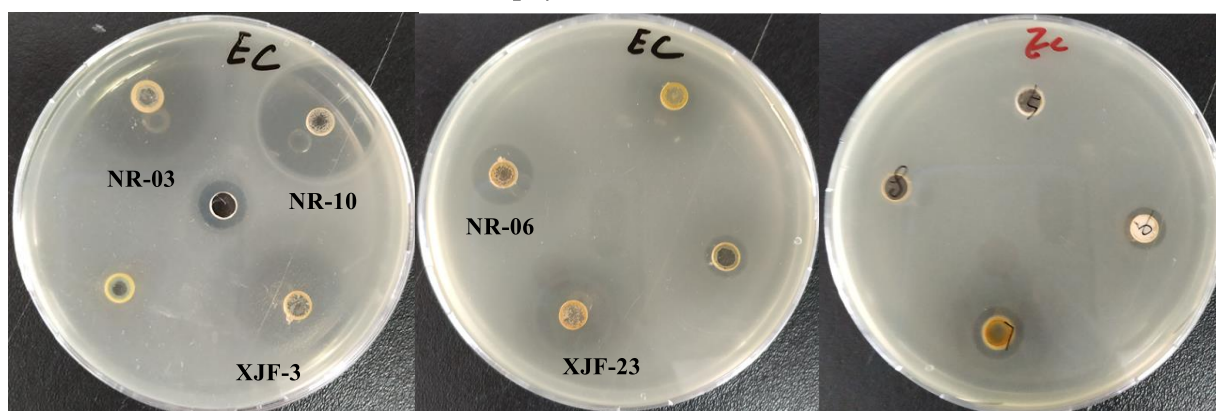

*Escherichia coli*

**Figure S1.** Antimicrobial activity of ethyl acetate crude extract of endophytic fungi evaluated by the diameter of inhibition zone (mm).

HPLC Analysis of secondary metabolites produced in different medium from endophytic fungus  
*Ovatospora senegalensis*

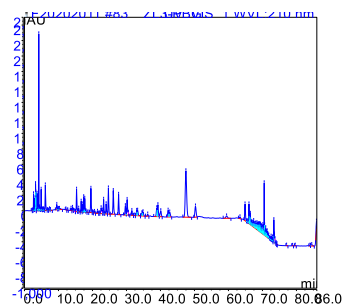

**Figure S2.** HPLC analysis of secondary metabolites produced by *O. senegalensis* NR-03 in the peptone beef extract glycogen medium (PBG)

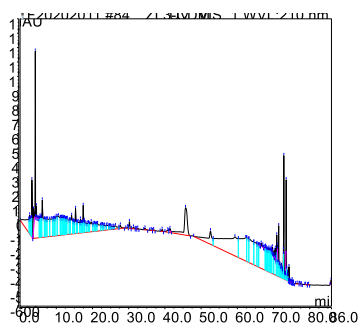

**Figure S3.** HPLC analysis of secondary metabolites produced by *O. senegalensis* NR-03 in the Czapeck-Dox medium (CDM)

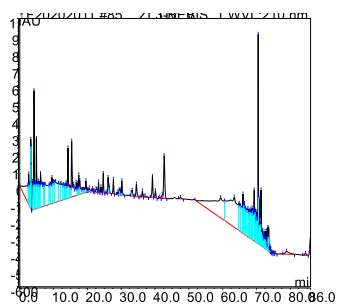

**Figure S4.** HPLC analysis of secondary metabolites produced by *O. senegalensis* NR-03 in the Beef extract broth (BEB)

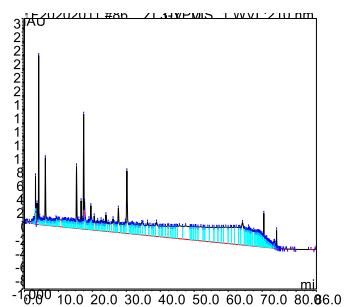

**Figure S5.** HPLC analysis of secondary metabolites produced by *O. senegalensis* NR-03 in the Yeast extract peptone dextrose (YPD)

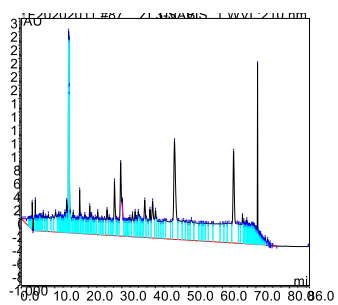

**Figure S6.** HPLC analysis of secondary metabolites produced by *O. senegalensis* NR-03 in the Sapouraund broth (SAB)



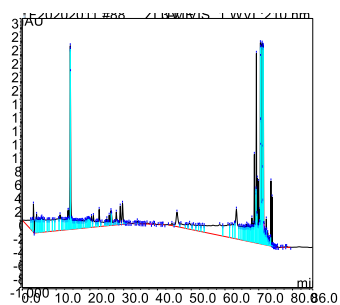

**Figure S7.** HPLC analysis of secondary metabolites produced by *O. senegalensis* NR-03 in the Malt extract broth (MEB)

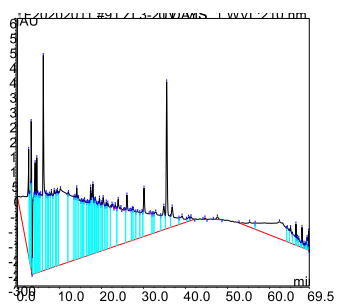

**Figure S8.** HPLC analysis of secondary metabolites produced by *O. senegalensis* NR-03 in the Potato Dextrose broth (PDB)

Chemical composition of endophytic fungus *O. senegalensis* NR-03 of analysed by GCMS

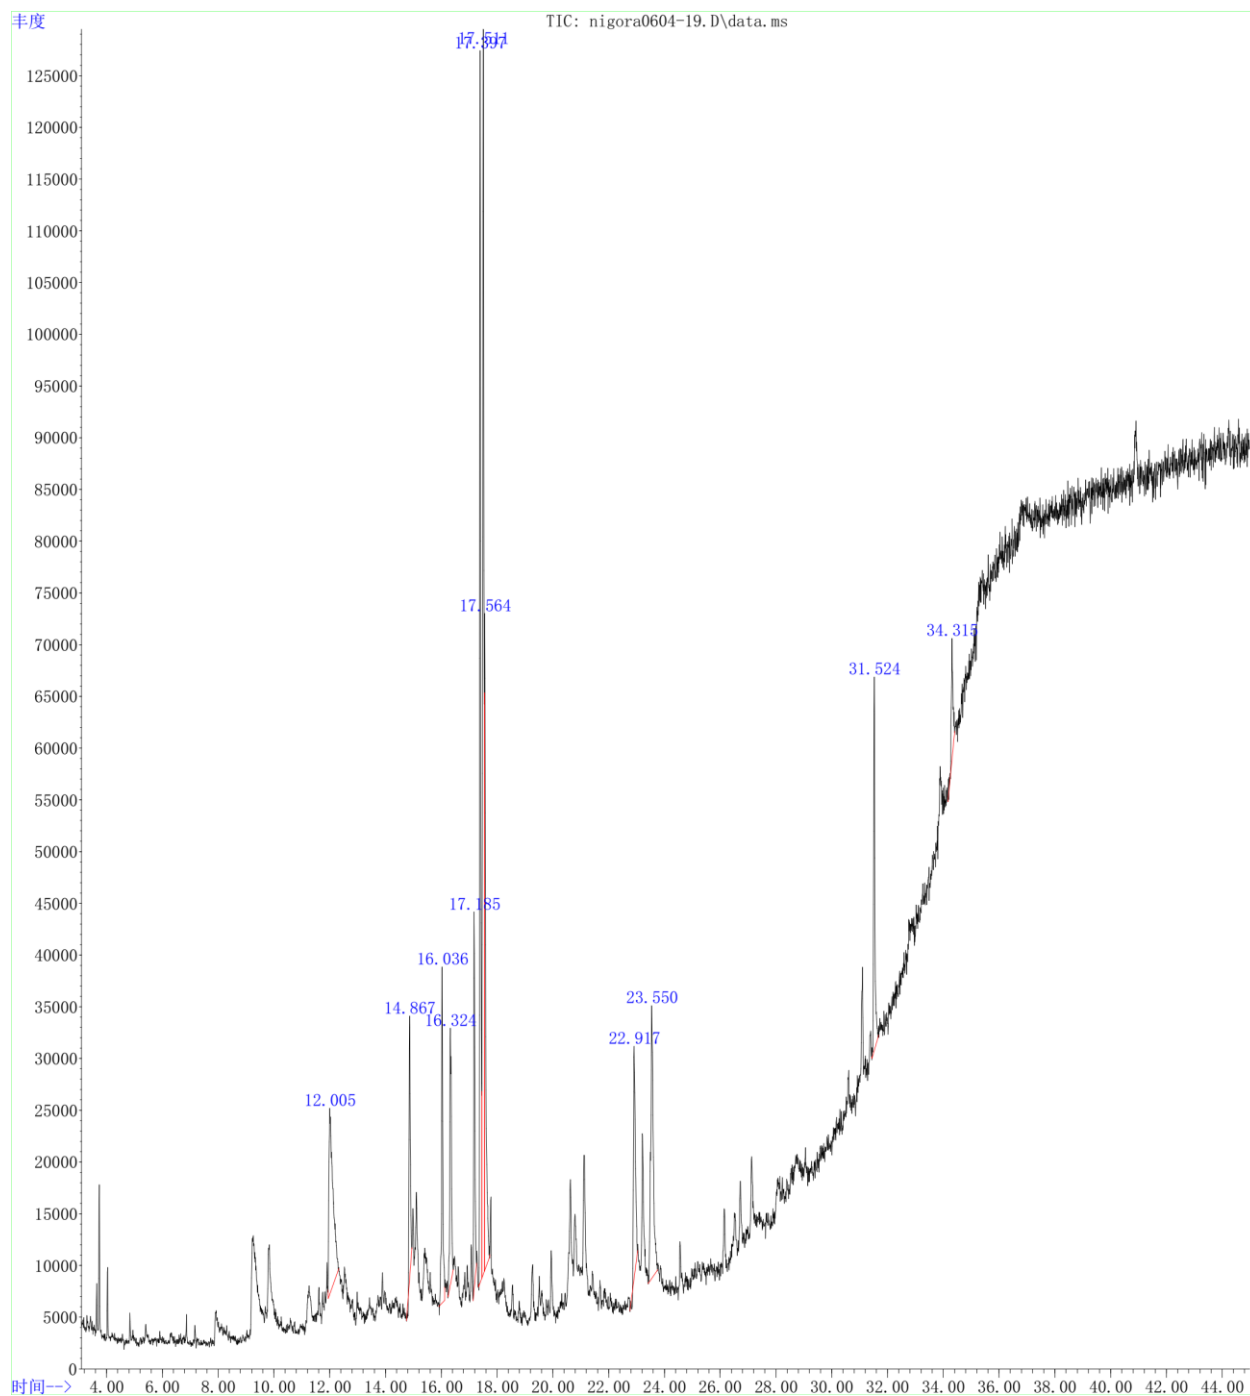

**Figure S9.** Volatile chemical composition dichloromethane extract of the endophytic fungus of *O. senegalensis* NR-03 growth on BEB medium.

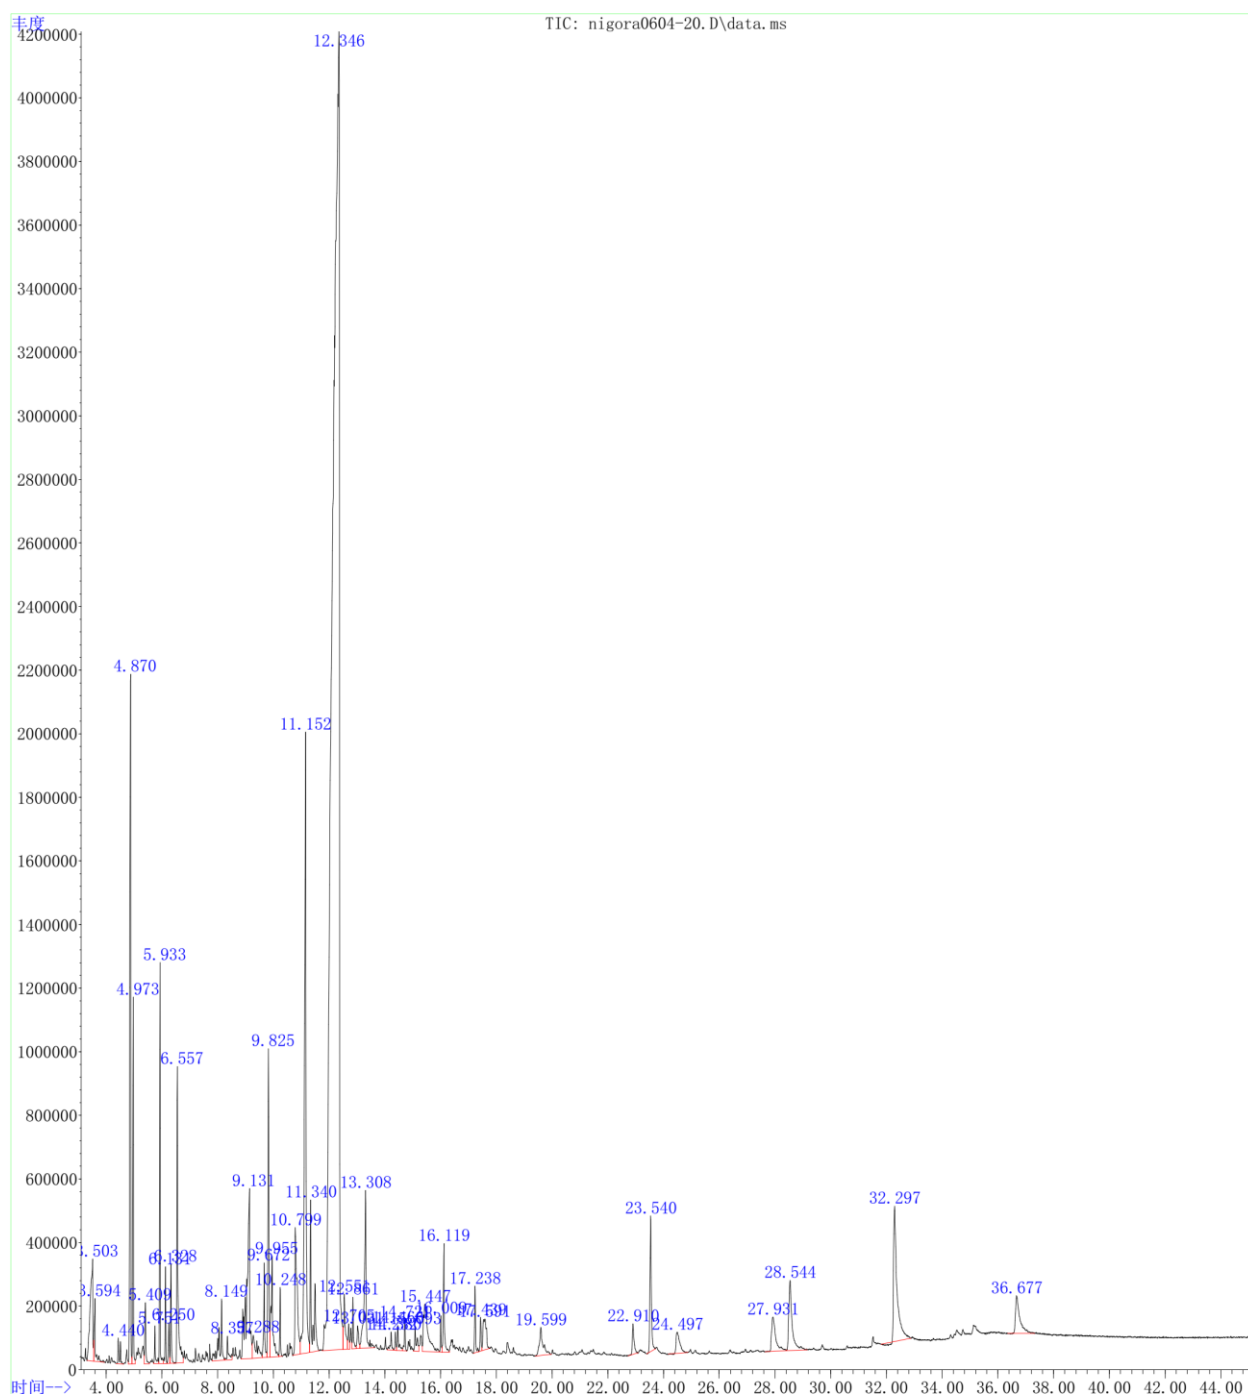

**Figure S10.** Volatile chemical composition dichloromethane extract of the endophytic fungus of *O. senegalensis* NR-03 growth on BEB medium.



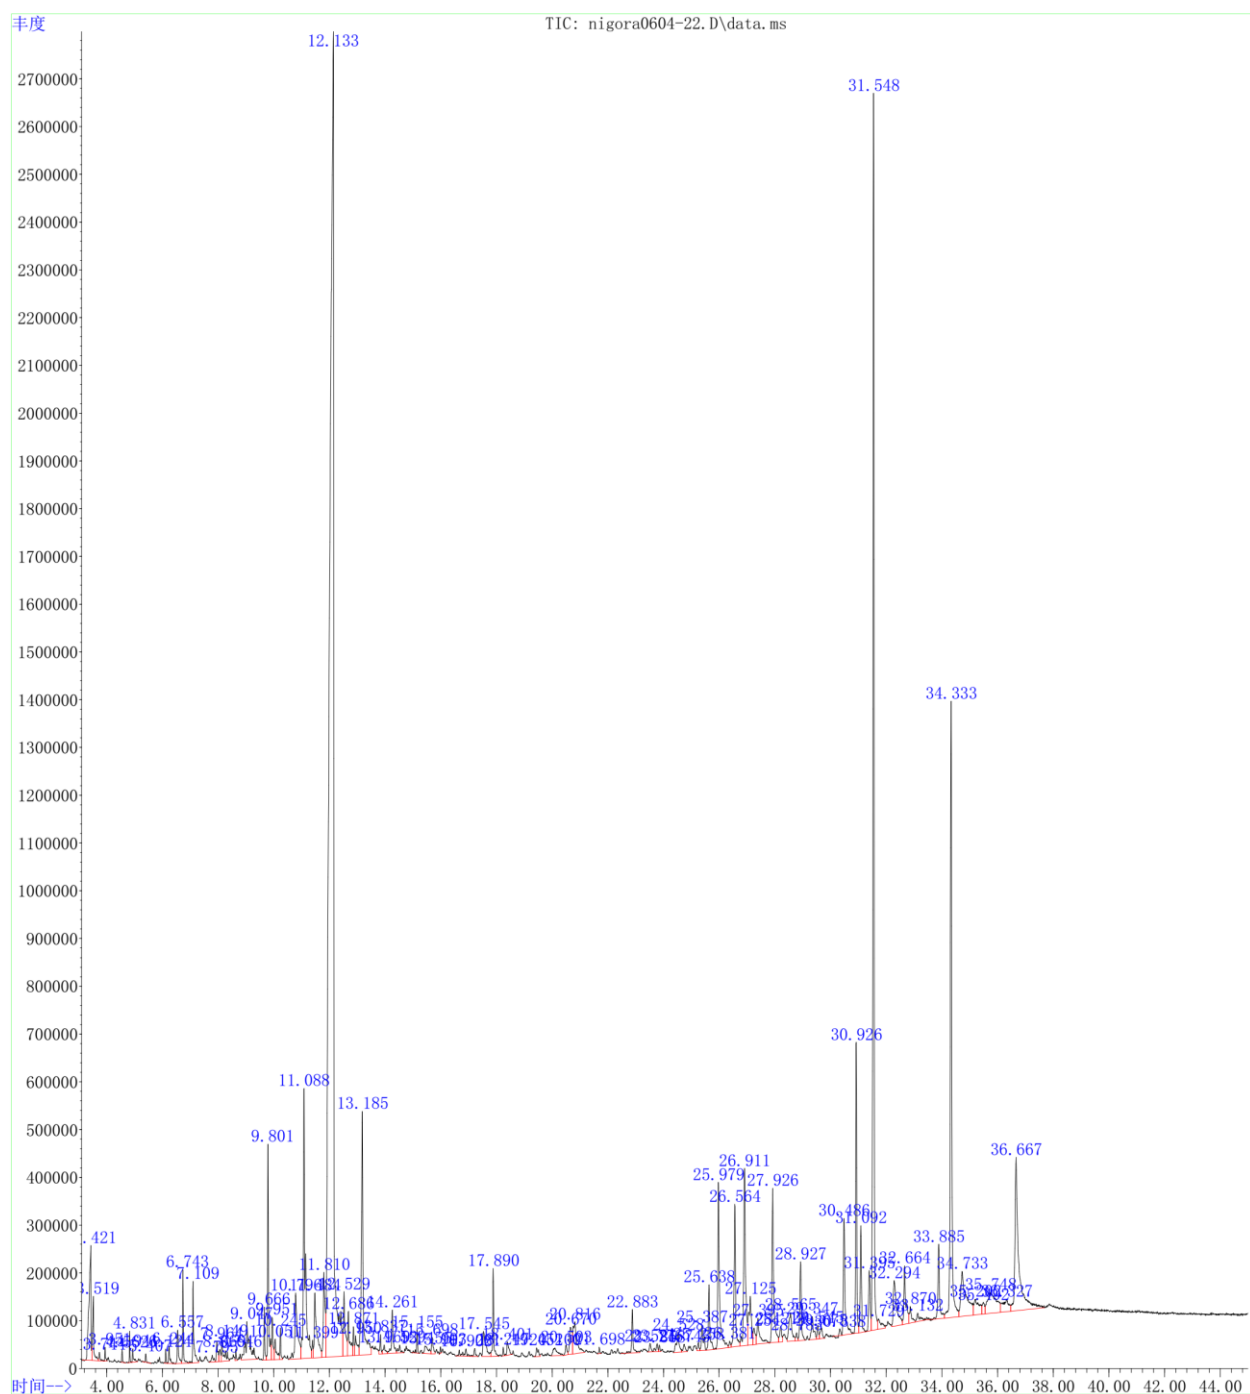

**Figure S12.** Volatile chemical composition dichloromethane extract of the endophytic fungus of *O. senegalensis* NR-03 growth on MEM medium.

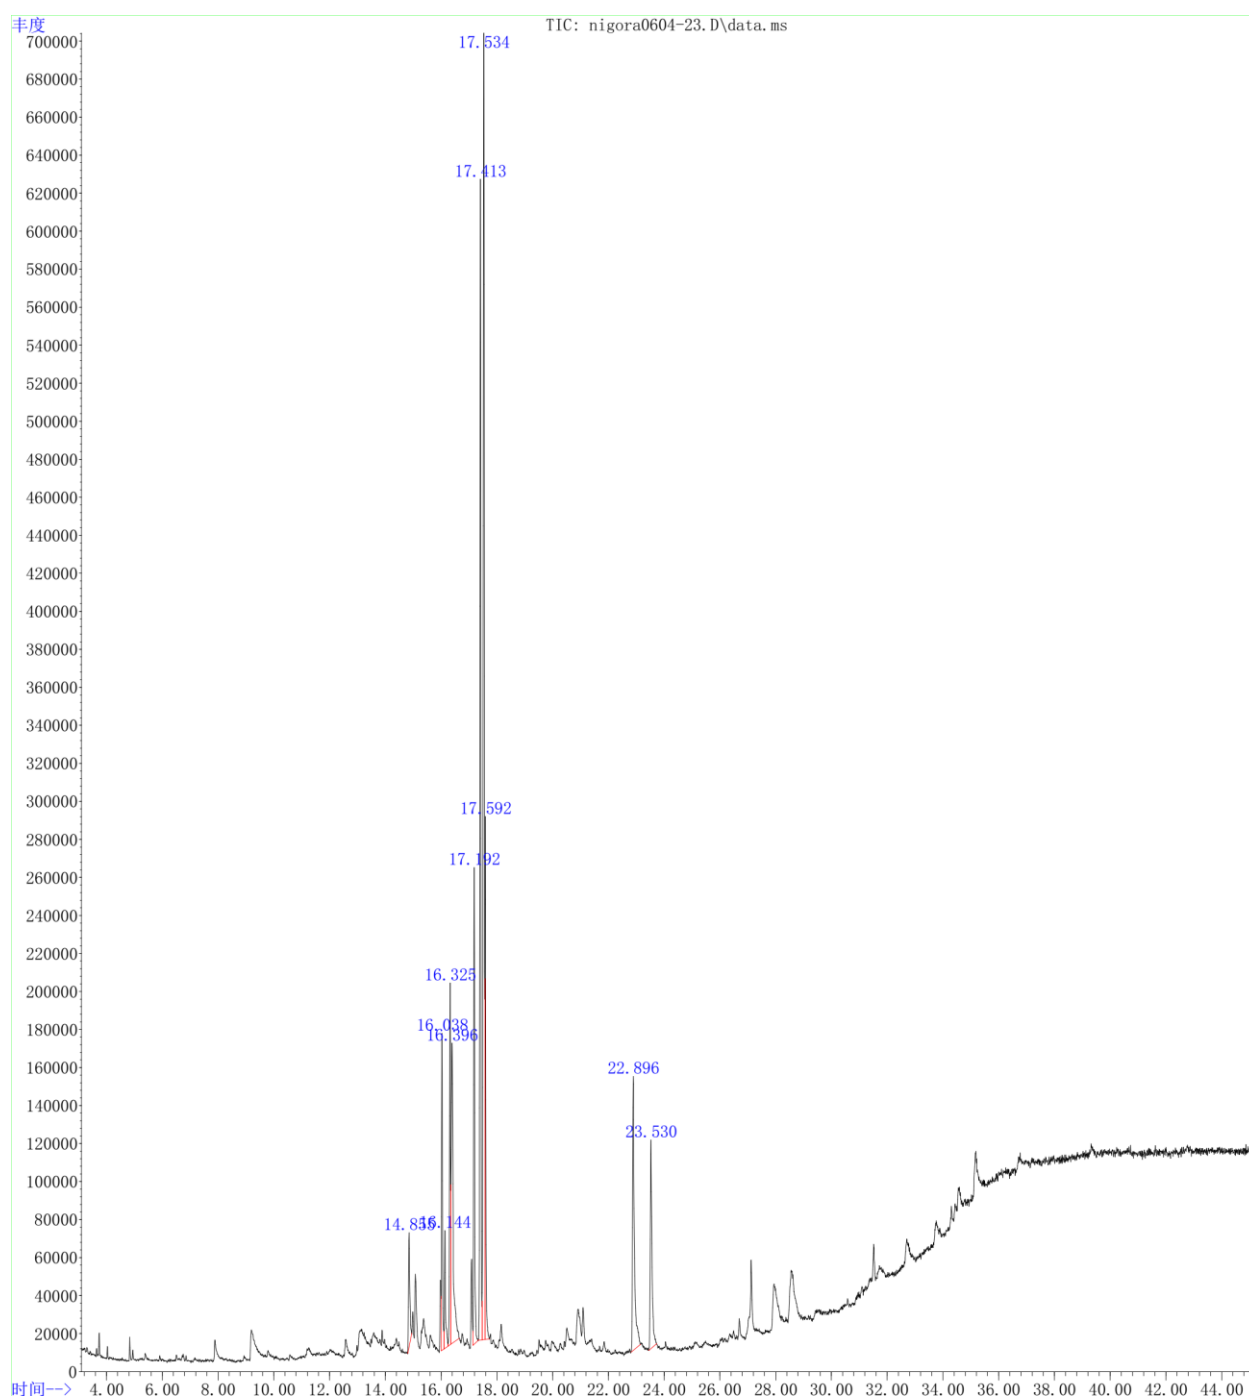

**Figure S13.** Volatile chemical composition dichloromethane extract of the endophytic fungus of *O. senegalensis* NR-03 growth on PBG medium.

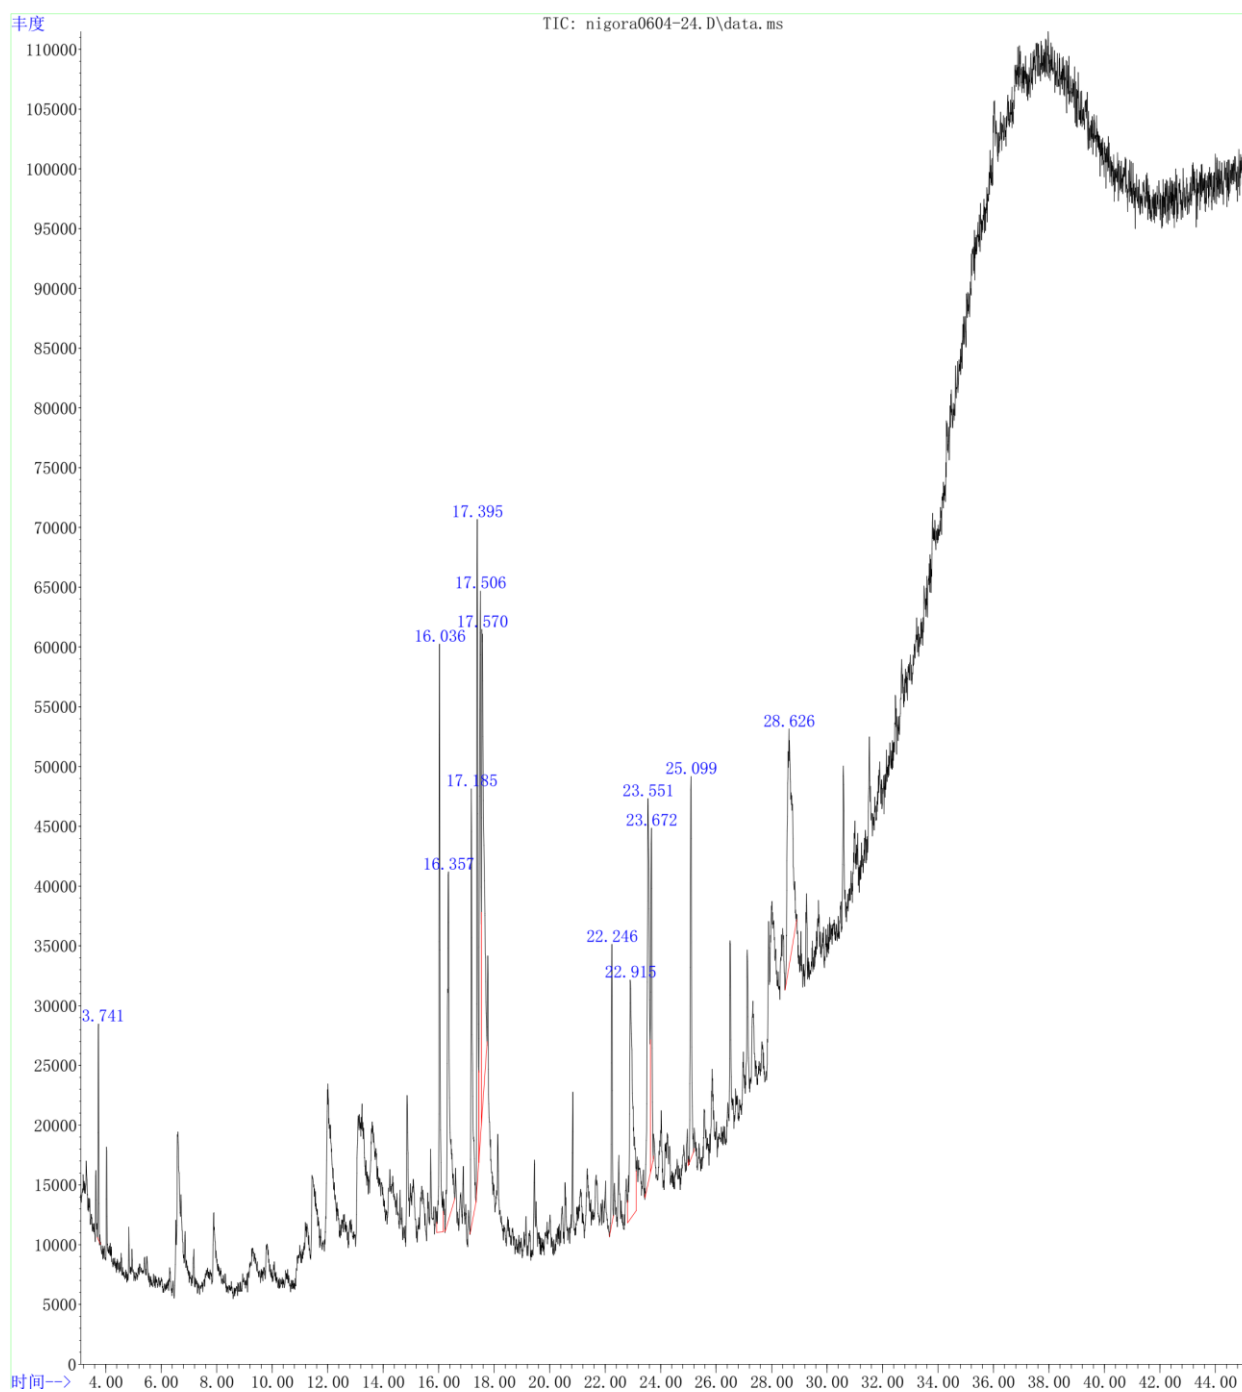

**Figure S14.** Volatile chemical composition dichloromethane extract of the endophytic fungus of *O. senegalensis* NR-03 growth on CDM medium.



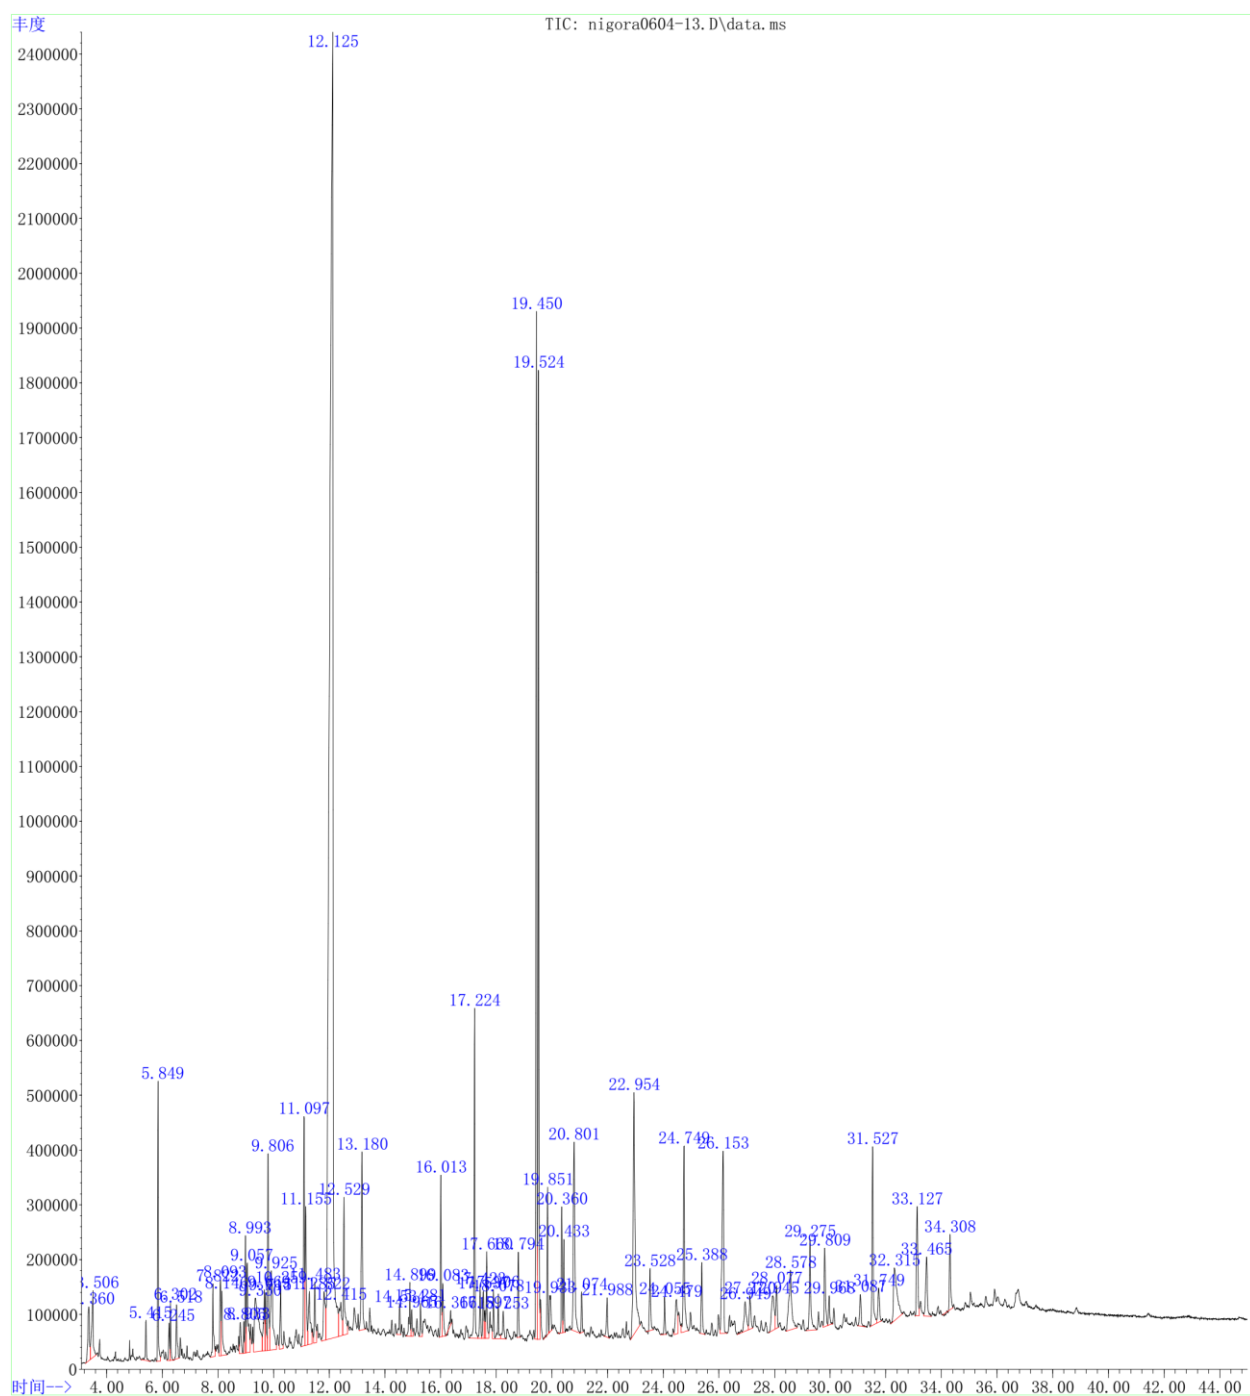

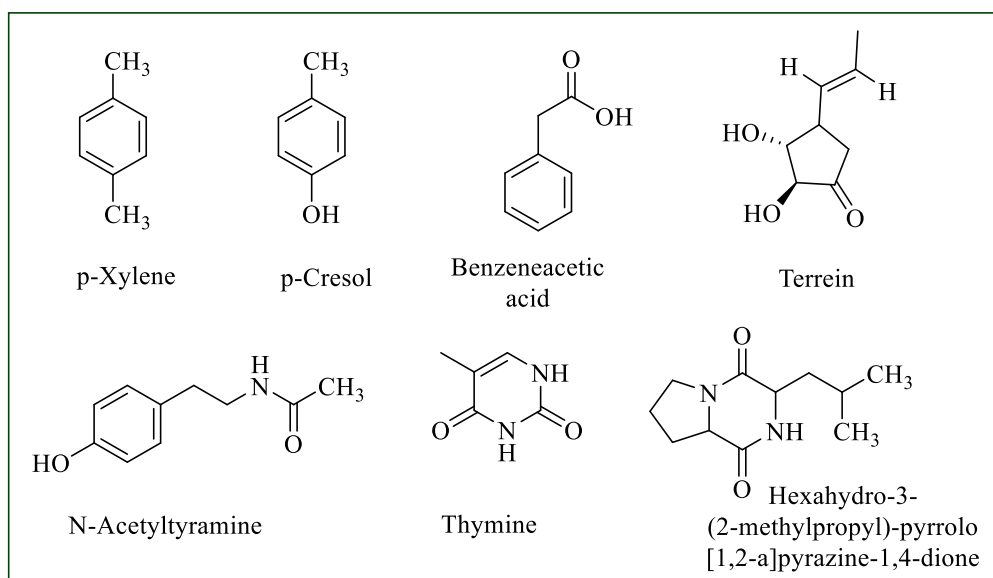

**Figure S16.** Chemical structure of same main volatile chemical compounds of dichloromethane fraction of *O. senegalensis* NR-03
